# Supplementary material for: Impact of structurally diverse polysaccharides on colonic mucin O-glycosylation and gut microbiota
Source: Research Square preprint supplement (doi:10.21203/rs.3.rs-2594808/v1), 2023-03-21
Supplement: Supplementary file 1 [file 4e830a1415143b6c54414a2c.pdf]

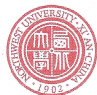

## 西北大学实验动物管理及福利伦理审批决议

Document of Approval by Experimental Animal management and ethics, Northwest University

|                                     |                                                                                                                                                                                                                                                                                                                                                                                                                                |                          |                                                                           |
|-------------------------------------|--------------------------------------------------------------------------------------------------------------------------------------------------------------------------------------------------------------------------------------------------------------------------------------------------------------------------------------------------------------------------------------------------------------------------------|--------------------------|---------------------------------------------------------------------------|
| 项目名称<br>Title of Project            | Impact of different dietary polysaccharides on colonic mucin O-glycosylation and gut microbiota                                                                                                                                                                                                                                                                                                                                |                          |                                                                           |
| 决议有效时间<br>License period            | 2021 年 5 月-- 2021 年 7 月                                                                                                                                                                                                                                                                                                                                                                                                        |                          |                                                                           |
| 项目负责人姓名<br>Name of Project Director | 黄琳娟<br>Huang Linjuan                                                                                                                                                                                                                                                                                                                                                                                                           | 申请单位<br>Application Unit | 食品科学与工程学院<br>College of Food Science and Technology, Northwest University |
| 其他参与实验人员<br>Other participants      | 龚桂萍、赵彤、刘思宁、张越<br>Gong Guiping, Zhao Tong, Liu Sining, Zhang Yue                                                                                                                                                                                                                                                                                                                                                                |                          |                                                                           |
| 受理编号<br>Acceptance No.              | AWC-20210401                                                                                                                                                                                                                                                                                                                                                                                                                   | 决议编号<br>Resolution No.   | NWU-AWC-20210401M                                                         |
| 申请人承诺<br>Commitment of applicant    | <p>本表及附件所包含的内容属实, 如获批准, 我将负责并监督所有参与实验人员严格按照批准的方案进行研究, 并遵守伦理委员会的相关规定。</p> <p>The contents of this form and attachments are true. If approved, I will supervise all participants in the experiment, be responsible to conduct research strictly accordance with the approved protocol, and comply with the relevant provisions of the ethics committee.</p> <p>项目负责人签字: 黄琳娟<br/>Applicant signature</p> <p>Date: 2021. 4. 14</p> |                          |                                                                           |
| 伦理委员会<br>审批意见<br>Approval comments  | <p>经审查, 该项目符合实验动物管理及福利伦理规范的相关规定, 同意依据批准的申请书内容开展执行。</p> <p>After reviews, the project contents conforms to the relevant regulations of the Laboratory Animal Management, Welfare and Ethics, and it is agreed to implement according to the approved application.</p> <p>委员会主任(签章): 齐晓光<br/>Committee chairman signature:</p> <p>西北大学实验动物管理及伦理委员会(盖章)<br/>Official seal</p> <p>Date: 2021 年 4 月 20 日</p>                        |                          |                                                                           |
